# Supplementary material
Source: PubMed Central journal article supplement (PMC7748991)
Supplement: NIHMS1640379-supplement-Supp_-_2___Table_.pdf [file NIHMS1640379-supplement-Supp_-_2___Table_.pdf]

**Table S1. OVX-driven expression trend of miRNAs, their number of target genes, and linkage to angiogenesis.**

| <b>miRNA</b> | <b>Expression Trend</b> | <b>Target Gene Number</b> | <b>Linkage to angiogenesis (Yes or No)</b> |
|--------------|-------------------------|---------------------------|--------------------------------------------|
| miR-205-5p   | up-regulated            | 179                       | <b>Yes</b>                                 |
| miR-532-5p   | up-regulated            | 39                        | <b>No</b>                                  |
| miR-155-5p   | up-regulated            | 106                       | <b>No</b>                                  |
| miR-214-3p   | up-regulated            | 669                       | <b>Yes</b>                                 |
| miR-224-5p   | up-regulated            | 10                        | <b>No</b>                                  |
| miR-199a-3p  | up-regulated            | 130                       | <b>Yes</b>                                 |
| miR-199a-5p  | up-regulated            | 172                       | <b>Yes</b>                                 |
| miR-92b-3p   | up-regulated            | 421                       | <b>No</b>                                  |
| miR-196b-5p  | up-regulated            | 127                       | <b>No</b>                                  |
| miR-98-5p    | down-regulated          | 293                       | <b>No</b>                                  |
| miR-337-5p   | down-regulated          | 362                       | <b>No</b>                                  |
| miR-365-1-5p | down-regulated          | 268                       | <b>No</b>                                  |
| miR-331-5p   | down-regulated          | 142                       | <b>No</b>                                  |
| miR-505-5p   | down-regulated          | 232                       | <b>No</b>                                  |
